# Supplementary material for: Indirect multiphoton scattering between light and bulk plasmons via ultrafast free electrons
Source: Research Square preprint supplement (doi:10.21203/rs.3.rs-7452109/v1), 2025-09-11
Supplement: Supplementary file 1 [file b90b4153a89726a248e03fec.docx]

**Indirect multiphoton scattering between light and bulk plasmons via ultrafast free electrons**

Ruoyu Chen1,2, Jun Li3*, Qiaofei Pan4,5,Dingguo Zheng3, Bin Zhang6, Ye Tian2，Jianqi Li3, Huaixin Yang3*, Yiming Pan1*

*1State Key Laboratory of Quantum Functional Materials, School of Physical Science and Technology and Center for Transformative Science, ShanghaiTech University, Shanghai 200031, China*

*2 State Key Laboratory of Ultra-intense Laser Science and Technology, Shanghai Institute of Optics and Fine Mechanics, Chinese Academy of Sciences, Shanghai, China*

*3Beijing National Laboratory for Condensed Matter Physics, Institute of Physics, Chinese Academy of Sciences, Beijing, China*

4Institute of Precision Optical Engineering, School of Physics Science and Engineering, Tongji University, Shanghai, 200092, China

5MOE Key Laboratory of advanced micro-structure materials, Shanghai, 200092, China

*6School of Electrical Engineering - Physical Electronics, Center of Laser-Matter Interaction, Tel Aviv University, Ramat Aviv 69978, Israel*

**Appendix A : Second Quantization of Plasmon**

First, a 515 nm laser impinges on the sample surface, inducing photon-plasmon coupling46 described by:

Here, () is the photon creation (annihilation) operator of the incident laser for in-plane wave vector , with dispersion . The plasmon creation (annihilation) operator () carries frequency , where accounts for plasmon inelastic decay. The coupling constant ​ quantifies the photon-plasmon interaction. The first two terms represent the free photon and plasmon Hamiltonians, the third term mediates their hybridization.

Using the basis set and , we rewrite the Hamiltonian as follows and achieving its diagonalization through the application of the Bogoliubov transformation.

we let

The derived and ​ represent the two branches of plasmon excitations. Specifically, ​ corresponds to the surface plasmons polariton (SPP), whereas is associated with the bulk plasmons polariton. And we obtained the expression for the expansion coefficients as

The respective energy expressions for these branches are as follows:

When ​, the value of is determined as: .Thus, the Hamiltonian can now be expressed as:

where

Since my laser emits monochromatic light and there is only one type of BPs in silicon, we set q=1 in this case.

Here, and

**Appendix B: Electron–Surface Plasmon Interaction**

The coupling between the electron and SPP is described by the following Hamiltonian:

In the Coulomb gauge, where , is the Lorentz factor. The electric field represents the result of the coupling between light and SPP. Now, by performing second quantization on this electric field, we obtain:

This enables energy and momentum transfer to the electron. Using the Floquet-Bloch theorem, applicable to periodically driven systems, we express the electron’s wave function . Here, is the component perpendicular to the electron’s incident direction. is the impact parameter of the beam relative to the particle.

In this context, denotes the momentum component of the -th harmonic. Typically, depends on the period of the intermediate medium (not the laser wavelength), while is the laser’s optical cycle. The amplitude ​ represents the slow-wave component of the -th harmonic.

We assume a well-collimated electron beam. is the impact parameter of the beam relative to the particle. This way, the expression can be further simplified as follows:

The constant terms are absorbed into the operators, resulting in:

Then we get

with the rotation wave approximation, the phase matching condition is satisfied: . This approach elegantly simplifies the integral:

Since the incident laser is monochromatic and has a unique incident angle, the excited has only one mode. Thus, our equation finally simplifies to:

Where. Since , we approximate . where is the effective coupling constant between the electron and the SPP field, where denotes the SPP’s longitudinal electric field amplitude driven by laser. This Hamiltonian encodes SPP-mediated PINEM transitions, where the term corresponds to the absorption of an SPP quantum by the electron, inducing an upward energy step on the synthetic ladder, while the conjugate term represents the process of stimulated emission and downward transition.

**Appendix C: Second Quantization of Dipole**

The interaction between the electron and BPs is described within dipole approximation. The dipole moment is determined by the position operator via

We assume an atom with only two energy eigenvalues is described by a two-dimensional state space spanned by the two energy eigenstates and . So we can write down an arbitrary state . Then the expectation value for the dipole moment of an atom in this state is

The atoms posses inversion symmetry, therefore, energy eigenstates must be symmetric or anti-symmetric, i.e. . We obtain

In this equation, fiert term describes a transition fron to , corresponding to energy emission; the other term represents the reverse process of the first. Accordingly, we describe this process using the ladder operators of the quantized BP field.

Here, we use as the index to denote the various BPs mode.

**Appendix D: Electron–Bulk Plasmon Interaction**

In the electron's own reference frame, the Coulomb field at position simplifies to: . Given that 200 keV electrons propagates at in transmission electron microscopy, a relativistic time-dilation correction is applied. By applying a coordinate transformation with ，， and , we obtain:

Here, our electronic wave function is . In a uniform cylindrical charge density moving at ultra-relativistic speed, the transverse space charge forces disappear. This is due to the cancellation of electric and magnetic forces, which causes the transverse force to vanish at a rate proportional to.

Here, we approximate the integral , which simplifies the entire equation

Now, we can express the equation in a simpler form:

Then we have

At this point, the phase matching condition must also be satisfied, which is .

That’s means:

where is complex coupling constants.Since the incident laser is monochromatic and has a unique incident angle, the excited has only one mode. Thus, our equation finally simplifies to:

where is the complex coupling strength between an electron sideband transition. The first term corresponds to the electron losing energy to excite a BP(annihilating one electron quantum and creating a BP excitation), while the second term describes the reverse process: the electron gains energy via stimulated emission from an existing BP. Together, these terms account for coherent bidirectional exchange of energy between the electron and BP field, essential for mediating photon–BP coupling via the electron’s modulated quantum state.
